# Supplementary material
Source: publisher figshare collection journal article supplement (https://karger.figshare.com/ndownloader/files/12418643)
Supplement: Supplementary file 1 [file 12418643]

### Table S2: Czech Republic: Results of the final annual treatment participation model (c fixed to 0.04)

|  | Imputed dataset | |  |  | Complete dataset | |  |
| --- | --- | --- | --- | --- | --- | --- | --- |
|  | Estimate | SE | P |  | Estimate | SE | P |
| a | -0.289 | 0.038 | <.0001 |  | -0.290 | 0.038 | <.0001 |
| b | 0.471 | 0.075 | <.0001 |  | 0.472 | 0.075 | <.0001 |
| d | -0.571 | 0.026 | <.0001 |  | -0.571 | 0.026 | <.0001 |
| dNon-Prague | -0.149 | 0.034 | <.0001 |  | -0.148 | 0.034 | <.0001 |
|  |  |  |  |  |  |  |  |
|  | RR | 95% CI- | 95% CI+ |  | RR | 95% CI- | 95% CI+ |
| dNon-Prague | 0.861 | 0.806 | 0.921 |  | 0.862 | 0.807 | 0.922 |
|  |  |  |  |  |  |  |  |
|  |  |  |  |  |  |  |  |
| -2 Log-Likelihood | | 34024 |  |  |  | 33998 |  |
| BIC | | 34057 |  |  |  | 34037 |  |
|  |  |  |  |  |  |  |  |
|  |  |  |  |  |  |  |  |
| Observations | | 25845 |  |  |  | 25830 |  |
| Patients |  | 3439 |  |  |  | 3437 |  |
| Max. observations per patient | | 14 |  |  |  | 14 |  |
|  |  |  |  |  |  |  |  |
| Period |  | 2000-2014 |  |  |  | 2000-2014 |  |
